# Supplementary material for: Tight junction protein occludin regulates progenitor Self-Renewal and survival in developing cortex
Source: eLife. 2019 Dec 3;8:e49376. doi: 10.7554/eLife.49376 (PMC6890460; doi:10.7554/eLife.49376)
Supplement: Figure 2—source data 1. [file elife-49376-fig2-data1.xlsx]

## Sheet: Figure 2 source data
Figure 2 - Source Data 1
Mean, SEM, sample size (n), and p-value summaries for Figure 2 quantifications
	Figure 2F
		Cortex Area (in mm)
			Ocln +/+			Ocln ΔN/ΔN
			Mean	SEM	n	Mean	SEM	n
		E16.5	11.03	1.07	4	10.92	0.4672	6
		P7	49.07	0.9938	8	43.71	0.6511	8
		P20	69.02	0.6234	3	62.98	0.5337	3
		Two-way ANOVA (with Sidak's multiple comparison test)
		Ocln +/+ vs Ocln ΔN/ΔN	Mean Diff.	95.00% CI of diff.	Significant?	Summary	P Value
		E16.5	0.11	-3.174 to 3.394	No	ns	0.9997
		P7	5.36	2.816 to 7.904	Yes	***	<0.0001
		P20	6.04	1.886 to 10.19	Yes	**	0.003
	Figure 2H
		P20 Cortex Thickness (in mm)
			Ocln +/+			Ocln ΔN/ΔN
			Mean	SEM	n	Mean	SEM	n
		P20	1.385	0.01043	5	1.342	0.005559	5
		Student t-test (two-tailed)
		Ocln +/+ vs Ocln ΔN/ΔN	Mean Diff.	95.00% CI of diff.	Significant?	Summary	P Value
		P20	-0.043	-0.07025 to -0.01575	Yes	**	0.0066
