# Supplementary material for: Tight junction protein occludin regulates progenitor Self-Renewal and survival in developing cortex
Source: eLife. 2019 Dec 3;8:e49376. doi: 10.7554/eLife.49376 (PMC6890460; doi:10.7554/eLife.49376)
Supplement: Figure 3—figure supplement 1—source data 1. [file elife-49376-fig3-figsupp1-data1.xlsx]

## Sheet: Figure 2 source data
Figure 3-Figure Supplement 1 - Source Data 1
Mean, SEM, sample size (n), and p-value summaries for Figure 3-Figure Supplement 1 quantifications
	Figure 3-Figure Supplement 1
			Cleavage Angle (E12.5)
			Ocln +/+			Ocln ΔN/ΔN
			Mean	SEM	n	Mean	SEM	n
			75.44	2.05	52	56.29	2.333	70
			Student t-test (two-tailed)
			Mean Diff.	95.00% CI of diff.	Significant?	Summary	P Value
			-19.16 ± 3.234	-25.56 to -12.75	Yes	***	<0.0001
