# Supplementary material for: Tight junction protein occludin regulates progenitor Self-Renewal and survival in developing cortex
Source: eLife. 2019 Dec 3;8:e49376. doi: 10.7554/eLife.49376 (PMC6890460; doi:10.7554/eLife.49376)
Supplement: Figure 3—source data 1. [file elife-49376-fig3-data1.xlsx]

## Sheet: Figure 3 source data
Figure 3 - Source Data 1
Mean, SEM, sample size (n), and p-value summaries for Figure 3 quantifications
	Figure 3B
		Mitotic Index (%)
			Ocln +/+			Ocln ΔN/ΔN
			Mean	SEM	n	Mean	SEM	n
		E10.5	3.907	0.1847	30	5.552	0.2909	30
		E12.5	2.715	0.1012	39	4.123	0.1615	34
		E14.5	1.608	0.04221	38	1.983	0.06776	36
		Two-way ANOVA (with Sidak's multiple comparison test)
		Ocln +/+ vs Ocln ΔN/ΔN	Mean Diff.	95.00% CI of diff.	Significant?	Summary	P Value
		E10.5	-1.645	-2.193 to -1.097	Yes	***	<0.0001
		E12.5	-1.408	-1.906 to -0.9102	Yes	***	<0.0001
		E14.5	-0.375	-0.8684 to 0.1184	No	ns	0.1924
	Figure 3D
		Distribution % of Mitotic Cells at Different Phases
			Prophase			PM+M			A+T
			Mean	SEM	n	Mean	SEM	n	Mean	SEM	n
		Ocln +/+	49	2.091	28	40.59	1.73	28	10.42	1.058	28
		Ocln ΔN/ΔN	26.94	1.697	29	60.38	1.823	29	12.69	1.014	29
		One-way ANOVA (with Sidak's multiple comparison test)
		Ocln +/+ vs Ocln ΔN/ΔN	Mean Diff.	95.00% CI of diff.	Significant?	Summary	P Value
		Prophase	22.06	16.54 to 27.58	Yes	****	<0.0001
		PM+M	-19.79	-25.31 to -14.28	Yes	****	<0.0001
		A=T	-2.27	-7.785 to 3.246	No	ns	0.6888
	Figure 3F
		% Ki67+ cells
		Ocln +/+			Ocln ΔN/ΔN
		Mean	SEM	n	Mean	SEM	n
		89.42	0.4591	30	83.86	0.5142	30
		Student t-test (two-tailed)
		Mean Diff.	95.00% CI of diff.	Significant?	Summary	P Value
		-5.567 ± 0.6894	-6.947 to -4.188	Yes	***	<0.0001
	Figure 3H
		Cas3+ (%)
			Ocln +/+			Ocln ΔN/ΔN
			Mean	SEM	n	Mean	SEM	n
		E10.5	0.03019	0.0147	41	0.1119	0.03496	46
		E12.5	0.03219	0.009366	40	0.1084	0.009366	40
		E14.5	0.07357	0.01609	35	0.07073	0.01447	39
		Two-way ANOVA (with Sidak's multiple comparison test)
		Ocln +/+ vs Ocln ΔN/ΔN	Mean Diff.	95.00% CI of diff.	Significant?	Summary	P Value
		E10.5	-0.08171	-0.1472 to -0.01623	Yes	**	0.0089
		E12.5	-0.07621	-0.1444 to -0.008041	Yes	*	0.0229
		E14.5	0.00284	-0.06814 to 0.07382	No	ns	0.9996
