# Supplementary material for: Tight junction protein occludin regulates progenitor Self-Renewal and survival in developing cortex
Source: eLife. 2019 Dec 3;8:e49376. doi: 10.7554/eLife.49376 (PMC6890460; doi:10.7554/eLife.49376)
Supplement: Figure 4—source data 1. [file elife-49376-fig4-data1.xlsx]

## Sheet: Figure 4 source data
Figure 4 - Source Data 1
Mean, SEM, sample size (n), p-value and statistical analyses for Figure 4 quantifications
	Figure 4B
		%PAX6 or TUJ1+ cells
			PAX6			TUJ1
			Mean	SEM	n	Mean	SEM	n
		Ocln +/+	85.92	0.4996	26	13.67	0.3854	26
		Ocln ΔN/ΔN	83.39	0.8715	26	15.64	0.8164	26
		Student t-test (Two-tailed)
		Ocln +/+ vs Ocln ΔN/ΔN	Mean Diff.	95.00% CI of diff.	Significant?	Summary	P Value
		PAX6	-2.532 ± 1.005	-4.55 to -0.5146	Yes	*	0.0149
		TUJ1	1.962 ± 0.9028	0.1298 to 3.793	Yes	*	0.0365
	Figure 4D
		% TBR2+/Ki67+ double-positive cells
		Ocln +/+			Ocln ΔN/ΔN
		Mean	SEM	n	Mean	SEM	n
		2.828	0.2039	26	3.637	0.1607	33
		Student t-test (two-tailed)
		Mean Diff.	95.00% CI of diff.	Significant?	Summary	P Value
		0.8089 ± 0.2559	0.2965 to 1.321	Yes	**	0.0025
	Figure 4F
		TUJ1+ Time course
			Ocln +/+			Ocln ΔN/ΔN
			Mean	SEM	n	Mean	SEM	n
		E12.5	14.83	0.3909	34	18.29	0.3732	48
		E14.5	18.36	0.4237	41	16.84	0.4907	51
		E16.5	33.7	0.4795	28	31.17	0.5879	30
		Two-way ANOVA (with Sidak's multiple comparison test)
		Ocln +/+ vs Ocln ΔN/ΔN	Mean Diff.	95.00% CI of diff.	Significant?	Summary	P Value
		E12.5	-3.46	-5.01 to -1.91	Yes	***	<0.0001
		E14.5	1.52	0.0691 to 2.971	Yes	*	0.0368
		E16.5	2.53	0.7124 to 4.348	Yes	**	0.0029
	Figure 4H
		#CTIP2 or CUX1 cells per bin (1,000 pixels^2)
			CTIP2			CUX1
			Mean	SEM	n	Mean	SEM	n
		Ocln +/+	35.48	1.208	20	25.79	0.8524	20
		Ocln ΔN/ΔN	28.15	0.6577	30	19.02	0.4547	30
		Student t-test (Two-tailed)
		Ocln +/+ vs Ocln ΔN/ΔN	Mean Diff.	95.00% CI of diff.	Significant?	Summary	P Value
		CTIP2	-7.325 ± 1.271	-9.881 to -4.769	Yes	***	<0.0001
		CUX1	-6.775 ± 0.8898	-8.564 to -4.986	Yes	***	<0.0001
