# Supplementary material for: Tight junction protein occludin regulates progenitor Self-Renewal and survival in developing cortex
Source: eLife. 2019 Dec 3;8:e49376. doi: 10.7554/eLife.49376 (PMC6890460; doi:10.7554/eLife.49376)
Supplement: Figure 6—source data 1. [file elife-49376-fig6-data1.xlsx]

## Sheet: Figure 6 source data
Figure 6 - Source Data 1
Mean, SEM, sample size (n), p-value and statistical analyses for Figure 6 quantifications
	Figure 6B
		Spheroid Size (circumferences measured in microns)
			WT			sg5			sg11
			Mean	SEM	n	Mean	SEM	n	Mean	SEM	n
		d10	994	15.08	61	1003	14.45	67	1007	11.06	40
		d20	2364	20.1	246	1687	17.76	170	1685	14.1	208
		d40	3364	75.5	91	2109	54.93	98	2164	32.92	50
		Two-way ANOVA (with Tukey multiple comparison test)
			Mean Diff.	95.00% CI of diff.	Significant?	Summary	P Value
		d10
		WT vs. sg5	-9	-152.5 to 134.5	No	ns	0.9881
		WT vs. sg11	-13	-177.9 to 151.9	No	ns	0.9813
		sg5 vs. sg11	-4	-166 to 158	No	ns	0.9981
		d20
		WT vs. sg5	677	596.1 to 757.9	Yes	***	<0.0001
		WT vs. sg11	679	602.6 to 755.4	Yes	***	<0.0001
		sg5 vs. sg11	2	-81.83 to 85.83	No	ns	0.9983
		d40
		WT vs. sg5	1255	1137 to 1373	Yes	***	<0.0001
		WT vs. sg11	1200	1057 to 1343	Yes	***	<0.0001
		sg5 vs. sg11	-55	-195.9 to 85.9	No	ns	0.6302
	Figure 6D
		Mitotic Index (%)
		WT			sg5			sg11
		Mean	SEM	n	Mean	SEM	n	Mean	SEM	n
		1.84	0.09065	32	2.419	0.1552	39	2.389	0.1304	30
		One-way ANOVA (with Tukey multiple comparison test)
			Mean Diff.	95.00% CI of diff.	Significant?	Summary	P Value
		WT vs. sg5	-0.5791	-0.9981 to -0.16	Yes	**	0.0045
		WT vs. sg11	-0.5493	-0.9958 to -0.1028	Yes	*	0.0125
		sg5 vs. sg11	0.02977	-0.4173 to 0.4768	No	ns	0.9863
	Figure 6E
		Ki67+ (%)
		WT			sg5			sg11
		Mean	SEM	n	Mean	SEM	n	Mean	SEM	n
		37.07	1.332	26	21.18	0.6872	23	20.56	0.8039	23
		One-way ANOVA (with Tukey multiple comparison test)
			Mean Diff.	95.00% CI of diff.	Significant?	Summary	P Value
		WT vs. sg5	15.89	12.47 to 19.31	Yes	***	<0.0001
		WT vs. sg11	16.51	13.08 to 19.93	Yes	***	<0.0001
		sg5 vs. sg11	0.617	-2.909 to 4.142	No	ns	0.9078
	Figure 6G
		Cas3+ cells in 100,000 um^2
		WT			sg5			sg11
		Mean	SEM	n	Mean	SEM	n	Mean	SEM	n
		5.602	0.9489	13	18.62	1.46	13	19.75	1.309	14
		One-way ANOVA (with Tukey multiple comparison test)
			Mean Diff.	95.00% CI of diff.	Significant?	Summary	P Value
		WT vs. sg5	-13.02	-17.43 to -8.606	Yes	***	<0.0001
		WT vs. sg11	-14.15	-18.48 to -9.82	Yes	***	<0.0001
		sg5 vs. sg11	-1.134	-5.465 to 3.197	No	ns	0.7995
	Figure 6I
		TUJ1+ area (%)
		WT			sg5			sg11
		Mean	SEM	n	Mean	SEM	n	Mean	SEM	n
		11.4	1.321	38	34.47	2.719	34	39.87	1.569	27
		One-way ANOVA (with Tukey multiple comparison test)
			Mean Diff.	95.00% CI of diff.	Significant?	Summary	P Value
		WT vs. sg5	-23.07	-29.48 to -16.67	Yes	***	<0.0001
		WT vs. sg11	-28.47	-35.31 to -21.64	Yes	***	<0.0001
		sg5 vs. sg11	-5.401	-12.4 to 1.596	No	ns	0.1629
	Figure 6K
		Ratio of HOPX+/NeuroD1+ cells
		WT			sg5			sg11
		Mean	SEM	n	Mean	SEM	n	Mean	SEM	n
		0.4125	0.04469	12	0.2066	0.02299	8	0.2062	0.03765	8
		One-way ANOVA (with Tukey multiple comparison test)
			Mean Diff.	95.00% CI of diff.	Significant?	Summary	P Value
		WT vs. sg5	0.2058	0.06706 to 0.3446	Yes	**	0.003
		WT vs. sg11	0.2063	0.06751 to 0.3451	Yes	**	0.0029
		sg5 vs. sg11	0.0004538	-0.1516 to 0.1525	No	ns	>0.9999
