# Supplementary material for: Tight junction protein occludin regulates progenitor Self-Renewal and survival in developing cortex
Source: eLife. 2019 Dec 3;8:e49376. doi: 10.7554/eLife.49376 (PMC6890460; doi:10.7554/eLife.49376)
Supplement: Figure 7—source data 1. [file elife-49376-fig7-data1.xlsx]

## Sheet: Figure 7 source data
Figure 7 - Source Data 1
Mean, SEM, sample size (n), p-value and statistical analyses for Figure 7 quantifications
	Figure 7D
		% Abnormal Spindle Pole Morphology
		WT			sg5			sg11
		Mean	SEM	n	Mean	SEM	n	Mean	SEM	n
		21.58	0.6827	4*	33.1	1.587	4	35.87	4.07	4
		One-way ANOVA (with Tukey multiple comparison test)
			Mean Diff.	95.00% CI of diff.	Significant?	Summary	P Value
		WT vs. sg5	-11.52	-21.6 to -1.438	Yes	*	0.0269
		WT vs. sg11	-14.29	-24.37 to -4.211	Yes	**	0.0084
		sg5 vs. sg11	-2.773	-12.85 to 7.307	No	ns	0.7307
	Figure 7F
		% Circularity
		WT			sg5			sg11
		Mean	SEM	n	Mean	SEM	n	Mean	SEM	n
		67.66	1.106	92	76.29	0.7013	104	75.25	0.8197	115
		One-way ANOVA (with Tukey multiple comparison test)
			Mean Diff.	95.00% CI of diff.	Significant?	Summary	P Value
		WT vs. sg5	-8.633	-11.63 to -5.638	Yes	***	<0.0001
		WT vs. sg11	-7.587	-10.51 to -4.66	Yes	***	<0.0001
		sg5 vs. sg11	1.046	-1.786 to 3.877	No	ns	0.6598
	Figure 7H
		Average astra alpha-tubulin Intensity per cell (arbitrary units)
		WT			sg5			sg11
		Mean	SEM	n	Mean	SEM	n	Mean	SEM	n
		73.41	8.448	30	29.41	2.79	32	26.8	3.038	32
		One-way ANOVA (with Tukey multiple comparison test)
			Mean Diff.	95.00% CI of diff.	Significant?	Summary	P Value
		WT vs. sg5	44	26.16 to 61.83	Yes	****	<0.0001
		WT vs. sg11	46.61	28.77 to 64.45	Yes	****	<0.0001
		sg5 vs. sg11	2.614	-14.93 to 20.16	No	ns	0.933
	Figure 7J
		% Cells with Misaligned Chromosomes
		WT			sg5			sg11
		Mean	SEM	n	Mean	SEM	n	Mean	SEM	n
		9.198	2.904	8*	26.46	4.391	8*	32.59	6.387	8*
		One-way ANOVA (with Tukey multiple comparison test)
			Mean Diff.	95.00% CI of diff.	Significant?	Summary	P Value
		WT vs. sg5	-17.26	-34.29 to -0.2249	Yes	*	0.0467
		WT vs. sg11	-23.39	-40.43 to -6.357	Yes	**	0.0063
		sg5 vs. sg11	-6.132	-23.17 to 10.9	No	ns	0.6417
	Figure 7K
		% Cells with Spindle Tilt
		WT			sg5			sg11
		Mean	SEM	n	Mean	SEM	n	Mean	SEM	n
		6.731	1.696	4*	17.54	1.809	5*	15.63	2.369	4*
		One-way ANOVA (with Tukey multiple comparison test)
			Mean Diff.	95.00% CI of diff.	Significant?	Summary	P Value
		WT vs. sg5	-10.81	-18.34 to -3.291	Yes	**	0.0071
		WT vs. sg11	-8.9	-16.83 to -0.9708	Yes	*	0.0288
		sg5 vs. sg11	1.913	-5.609 to 9.435	No	ns	0.7705
	Figure 7L
		% Cells with Asymmetric Spindle Density
		WT			sg5			sg11
		Mean	SEM	n	Mean	SEM	n	Mean	SEM	n
		10.15	1.73	4*	20.91	1.868	5*	22.82	2.319	4*
		One-way ANOVA (with Tukey multiple comparison test)
			Mean Diff.	95.00% CI of diff.	Significant?	Summary	P Value
		WT vs. sg5	-10.76	-18.34 to -3.17	Yes	**	0.0077
		WT vs. sg11	-12.67	-20.66 to -4.669	Yes	**	0.0038
		sg5 vs. sg11	-1.909	-9.496 to 5.677	No	ns	0.7745
	Figure 7M
		Average alpha-tubulin intensity per cell (arbitrary units)
		WT			sg5			sg11
		Mean	SEM	n	Mean	SEM	n	Mean	SEM	n
		106.3	2.189	128	76.38	2.83	137	82.76	2.853	116
		One-way ANOVA (with Tukey multiple comparison test)
			Mean Diff.	95.00% CI of diff.	Significant?	Summary	P Value
		WT vs. sg5	0.2058	0.06706 to 0.3446	Yes	**	0.003
		WT vs. sg11	0.2063	0.06751 to 0.3451	Yes	**	0.0029
		sg5 vs. sg11	0.0004538	-0.1516 to 0.1525	No	ns	>0.9999
